# Supplementary material
Source: PubMed Central journal article supplement (PMC5201185)
Supplement: ocw071_supp.pdf [file ocw071_supp.pdf]

**Supplemental Information: Hypertension regular expression**

Regular expression 1: `.*(?!pulm\w*\W*\w+\W+)hypertension.*` (case insensitive)

OR

Regular expression 2: `.*(?!pulm\w*\W*\w+\W+)HTN.*` (case insensitive)

### Supplemental Table 1: Full Set of Features by Category with Descriptions

The table separates all features into key groups used for simple algorithms and to train random forests. Document counts were separately included with the regular expression (RegEx) category, NLP-based concepts, or only once when we used both note-based categories. Lines divide the three subcategories of “ICD9, medications, all BP” features which we also used to train random forests individually. The explanation for each feature is given alongside its column identifier as used in the accompanying KNIME module example input.

| Category                                                          | Descriptor                                       |
|-------------------------------------------------------------------|--------------------------------------------------|
| ICD9, medications, all BP                                         | date-ICD9 count                                  |
|                                                                   | unique ICD9 count                                |
|                                                                   | hypertension ICD9 count                          |
|                                                                   | unique hypertension ICD9 count                   |
|                                                                   | hypertension ICD9 count normalized               |
|                                                                   | hypertension ICD9 count unique normalized        |
|                                                                   | unique hypertension ICD9 count normalized        |
|                                                                   | unique hypertension ICD9 count unique normalized |
|                                                                   | meds count                                       |
|                                                                   | unique meds count                                |
|                                                                   | HYPERTENSION meds count                          |
|                                                                   | unique hypertension meds count                   |
|                                                                   | hypertension meds count normalized               |
|                                                                   | hypertension meds count unique normalized        |
|                                                                   | unique hypertension meds count normalized        |
|                                                                   | unique hypertension meds count unique normalized |
|                                                                   | max age                                          |
|                                                                   | vital reading time span (days)                   |
|                                                                   | visits with vitals count (days)                  |
| hypertensive BP count (days)                                      |                                                  |
| median systolic (all)                                             |                                                  |
| median diastolic (all)                                            |                                                  |
| hypertensive BP count normalized                                  |                                                  |
| vitals density                                                    |                                                  |
| All vitals with separate outpatient and inpatient blood pressures | outpatient visits with vitals count (days)       |
|                                                                   | outpatient hypertensive BP count (days)          |
|                                                                   | median systolic (outpatient)                     |
|                                                                   | median diastolic (outpatient)                    |
|                                                                   | outpatient hypertensive BP count normalized      |
|                                                                   | outpatient vitals density                        |
|                                                                   | inpatient visits with vitals count (days)        |

inpatient hypertensive BP count (days)  
median systolic (inpatient)  
median diastolic (inpatient)  
inpatient hypertensive BP count normalized  
inpatient vitals density  
median pulse (all)  
median pulse (outpatient)  
median pulse (inpatient)

**Document counts**

PL count  
DS count  
HPC count  
All document count

**Regular expression counts and normalized features**

PL hypertension regular expression document matches  
DS hypertension regular expression document matches  
HPC hypertension regular expression document matches  
All doc hypertension regular expression document matches  
PL hypertension regular expression document matches document normalized  
DS hypertension regular expression document matches document normalized  
HPC hypertension regular expression document matches document normalized  
All doc hypertension regular expression document matches document normalized

**NLP-based concepts and normalized features**

PL concept count  
DS concept count  
HPC concept count  
All document concept count  
PL hypertension concept count  
DS hypertension concept count  
HPC hypertension concept count  
All document hypertension concept count  
PL hypertension concept count document normalized  
DS hypertension concept count document normalized  
HPC hypertension concept count document normalized  
All doc hypertension concept count document normalized  
PL hypertension concept count concept normalized  
DS hypertension concept count concept normalized  
HPC hypertension concept count concept normalized  
All doc hypertension concept count concept normalized

**Supplemental Table 2: Full Set of Hypertension-related ICD9 Billing Codes Used**

**CODE   CODE   DESC**

405.99 SECOND HYPERTENSION NEC

405      SECONDARY HYPERTENSION

405.9    SECOND HYPERTENSION NOS

401      ESSENTIAL HYPERTENSION

401.1    BENIGN HYPERTENSION

401.0    MALIGNANT HYPERTENSION

405.91 RENOASC HYPERTENSION

405.0    MAL SECOND HYPERTENSION

401.9    HYPERTENSION NOS

**Supplemental Table 3: Full Set of Hypertension-related Medication Strings Used (Based on MEDI-HPS)**

| <b>RXCUI</b> | <b>DRUG_DESC</b>           | <b>RXCUI (cont. 1)</b> | <b>DRUG_DESC<br/>(cont. 1)</b> | <b>RXCUI (cont. 2)</b> | <b>DRUG_DESC<br/>(cont. 2)</b> |
|--------------|----------------------------|------------------------|--------------------------------|------------------------|--------------------------------|
| 217597       | hydralazine                | 5036                   | guanethidine                   | 865575                 | metoprolol                     |
| 71515        | prazosin                   | 262242                 | eprosartan                     | 6860                   | methyclothiazid<br>e           |
| 5033         | guanabenz                  | 35296                  | ramipril                       | 3827                   | enalapril                      |
| 151890       | propranolol                | 203344                 | metoprolol                     | 831221                 | diltiazem                      |
| 1009015      | amlodipine<br>/ olmesartan | 136411                 | sildenafil                     | 202463                 | hydralazine                    |
| 754809       | prazosin                   | 5487                   | hydrochlorothia<br>zide        | 226918                 | orlistat                       |
| 225030       | fosinopril                 | 202509                 | nitroglycerin                  | 744629                 | amlodipine                     |
| 745969       | hydrochlorothia<br>zide    | 218710                 | potassium                      | 153668                 | irbesartan                     |
| 10602        | timolol                    | 9260                   | reserpine                      | 745974                 | hydrochlorothia<br>zide        |
| 19484        | bisoprolol                 | 220669                 | hydrochlorothia                | 151155                 | diltiazem                      |

|        |                      |        |                         |        |                        |
|--------|----------------------|--------|-------------------------|--------|------------------------|
|        |                      |        | zide                    |        |                        |
| 202510 | nitroglycerin        | 216778 | clonidine               | 724892 | valsartan              |
| 151300 | nifedipine           | 750200 | amlodipine              | 215917 | clonidine              |
| 203489 | verapamil            | 169050 | chlorthalidone          | 225959 | nitroglycerin          |
| 224934 | methyclothiazid<br>e | 219878 | hydralazine             | 218744 | nitroglycerin          |
| 216252 | nadolol              | 151882 | terazosin               | 31555  | nebivolol              |
| 856468 | propranolol          | 724876 | amlodipine              | 750204 | amlodipine             |
| 219881 | hydralazine          | 214354 | candesartan             | 142146 | bisoprolol<br>fumarate |
| 225752 | verapamil            | 219878 | reserpine               | 744887 | amlodipine             |
| 6918   | metoprolol           | 491231 | hydrochlorothia<br>zide | 724884 | amlodipine             |
| 225191 | reserpine            | 758540 | aliskiren               | 196460 | betaxolol              |
| 202369 | betaxolol            | 542847 | hydrochlorothia<br>zide | 203798 | metolazone             |
| 215673 | betaxolol            | 8565   | polythiazide            | 151482 | captopril              |

|        |                                     |        |                     |        |                      |
|--------|-------------------------------------|--------|---------------------|--------|----------------------|
| 196500 | perindopril                         | 823939 | hydrochlorothiazide | 196472 | lisinopril           |
| 328141 | Angelica<br>sinensis<br>preparation | 175128 | hydrochlorothiazide | 744633 | amlodipine           |
| 7973   | penbutolol                          | 29046  | lisinopril          | 540618 | diltiazem            |
| 217642 | reserpine                           | 6876   | methyldopa          | 216253 | timolol              |
| 203644 | lisinopril                          | 218102 | indapamide          | 151549 | nadolol              |
| 644    | amiloride                           | 215905 | hydrochlorothiazide | 217597 | hydrochlorothiazide  |
| 151294 | captopril                           | 284747 | reserpine           | 5495   | hydroflumethiazide   |
| 6916   | metolazone                          | 323502 | bosentan            | 219797 | reserpine            |
| 744621 | olmesartan                          | 154991 | enalapril           | 9997   | spironolactone       |
| 83367  | atorvastatin                        | 581642 | sildenafil          | 744891 | benazepril           |
| 750200 | atorvastatin                        | 216909 | methyclothiazide    | 203123 | enalapril<br>maleate |
| 705130 | nitroglycerin                       | 203477 | chlorthalidone      | 321064 | olmesartan           |

|        |                         |        |                                      |        |                     |
|--------|-------------------------|--------|--------------------------------------|--------|---------------------|
| 591568 | lloprost                | 17767  | amlodipine                           | 216675 | trichlormethiazide  |
| 49276  | doxazosin               | 214621 | hydrochlorothiazide / metoprolol     | 203275 | hydrochlorothiazide |
| 5470   | hydralazine             | 809019 | valsartan                            | 215910 | carteolol           |
| 203211 | diltiazem hydrochloride | 202941 | clonidine                            | 220391 | hydralazine         |
| 2396   | chlorothiazide          | 7417   | nifedipine                           | 750236 | amlodipine          |
| 20352  | carvedilol              | 214618 | hydrochlorothiazide / lisinopril     | 10828  | trimethaphan        |
| 196468 | doxazosin               | 6673   | mecamylamine                         | 9259   | rescinnamine        |
| 175128 | enalapril               | 219882 | hydralazine                          | 217653 | guanadrel           |
| 151486 | lisinopril              | 324042 | hydrochlorothiazide / spironolactone | 750196 | atorvastatin        |
| 214866 | trandolapril            | 708361 | orlistat                             | 8332   | pindolol            |



|        |                     |        |                |        |                          |
|--------|---------------------|--------|----------------|--------|--------------------------|
|        | / verapamil         |        |                |        |                          |
| 218936 | deserpidine         | 218353 | telmisartan    | 135481 | candesartan<br>cilexetil |
| 155091 | fenoldopam          | 1627   | timolol        | 203273 | hydrochlorothiazide      |
| 220391 | reserpine           | 151723 | carvedilol     | 218369 | hydrochlorothiazide      |
| 491095 | diltiazem           | 215919 | clonidine      | 215918 | clonidine                |
| 758540 | hydrochlorothiazide | 750228 | amlodipine     | 8629   | prazosin                 |
| 202525 | nitroglycerin       | 33910  | isradipine     | 78678  | Rauwolfia<br>preparation |
| 744871 | amlodipine          | 1202   | atenolol       | 809027 | valsartan                |
| 54635  | phentolamine        | 11170  | verapamil      | 4109   | ethacrynic<br>acid       |
| 3327   | diazoxide           | 749838 | telmisartan    | 541854 | nitroglycerin            |
| 202530 | nitroglycerin       | 219882 | reserpine      | 38454  | trandolapril             |
| 8787   | propranolol         | 2409   | chlorthalidone | 218747 | nitroglycerin            |

|        |              |        |                                 |        |                     |
|--------|--------------|--------|---------------------------------|--------|---------------------|
| 599    | alseroxylon  | 4316   | felodipine                      | 8149   | phenoxybenzamine    |
| 744625 | amlodipine   | 50166  | fosinopril                      | 202523 | nitroglycerin       |
| 190465 | sildenafil   | 744871 | benazepril                      | 750232 | amlodipine          |
| 758548 | aliskiren    | 750224 | atorvastatin                    | 40114  | guanfacine          |
| 491231 | timolol      | 202508 | nitroglycerin                   | 266604 | metyrosine          |
| 541103 | bumetanide   | 215871 | hydrochlorothiazide             | 750224 | amlodipine          |
| 1808   | bumetanide   | 805852 | candesartan                     | 203238 | triamterene         |
| 6877   | methyldopate | 72210  | quinapril                       | 744891 | amlodipine          |
| 152434 | torseamide   | 214357 | captopril / hydrochlorothiazide | 66977  | bepidil             |
| 750236 | atorvastatin | 142432 | clonidine hydrochloride         | 1369   | bendroflumethiazide |
| 62349  | ethacrynate  | 10600  | timolol                         | 724884 | valsartan           |
| 169050 | reserpine    | 202507 | nitroglycerin                   | 744875 | amlodipine          |

|        |                                   |        |                     |        |                     |
|--------|-----------------------------------|--------|---------------------|--------|---------------------|
| 151177 | nitroglycerin                     | 215870 | hydrochlorothiazide | 203494 | diltiazem           |
|        | bisoprolol                        |        |                     |        |                     |
| 214317 | /<br>hydrochlorothiazide          | 151172 | nitroglycerin       | 656315 | atenolol            |
| 216251 | nadolol                           | 220004 | spironolactone      | 10763  | triamterene         |
| 219881 | hydrochlorothiazide               | 2116   | carteolol           | 218748 | nitroglycerin       |
| 83818  | irbesartan                        | 724892 | amlodipine          | 358263 | tadalafil           |
| 151594 | metirosine                        | 750228 | atorvastatin        | 152413 | atenolol            |
| 542720 | nifedipine                        | 218749 | nitroglycerin       | 218750 | nitroglycerin       |
| 71512  | phenoxybenzamine<br>hydrochloride | 23742  | hydrochlorothiazide | 219412 | hydrochlorothiazide |
| 217643 | hydrochlorothiazide               | 151490 | nicardipine         | 23742  | triamterene         |
| 155033 | labetalol                         | 6958   | amiloride           | 750208 | atorvastatin        |

|        |                              |        |                                      |        |                             |
|--------|------------------------------|--------|--------------------------------------|--------|-----------------------------|
| 235230 | nicardipine<br>hydrochloride | 218754 | nitroglycerin                        | 545347 | nitroglycerin               |
| 629300 | diltiazem                    | 5034   | guanabenz                            | 217749 | mecamylamine                |
| 215869 | captopril                    | 220669 | reserpine                            | 217643 | reserpine                   |
| 831206 | diltiazem                    | 754803 | polythiazide                         | 142130 | acebutolol<br>hydrochloride |
| 583143 | terazosin                    | 218245 | trandolapril                         | 202595 | diazoxide                   |
| 152098 | indapamide                   | 823960 | hydrochlorothiazide                  | 215672 | timolol                     |
| 342280 | eplerenone                   | 541600 | nifedipine                           | 225702 | minoxidil                   |
| 809851 | quinapril                    | 151689 | ethacrynate                          | 219798 | hydroflumethiazide          |
| 202991 | furosemide                   | 298869 | eplerenone                           | 151558 | losartan                    |
| 202594 | diazoxide                    | 7226   | nadolol                              | 8588   | potassium                   |
| 52440  | hydrochlorothiazide          | 258337 | hydrochlorothiazide<br>/ triamterene | 202521 | nitroglycerin               |
| 216221 | carvedilol                   | 219798 | reserpine                            | 7008   | sotalol                     |

|        |                                       |        |                                         |        |                         |
|--------|---------------------------------------|--------|-----------------------------------------|--------|-------------------------|
|        |                                       |        |                                         |        | hydrochloride           |
| 142424 | amiloride<br>hydrochloride            | 38413  | torseamide                              | 754803 | prazosin                |
| 724876 | valsartan                             | 37798  | terazosin                               | 258346 | isradipine              |
| 214619 | hydrochlorothia<br>zide<br>/ losartan | 203160 | losartan<br>potassium                   | 202516 | nitroglycerin           |
| 215458 | candesartan                           | 227278 | fosinopril<br>sodium                    | 744887 | benazepril              |
| 203423 | nifedipine                            | 220669 | hydralazine                             | 216677 | chlorothiazide          |
| 93113  | penbutolol                            | 215869 | hydrochlorothia<br>zide                 | 203490 | verapamil               |
| 4917   | nitroglycerin                         | 214620 | hydrochlorothia<br>zide<br>/ methyldopa | 118463 | olmesartan<br>medoxomil |
| 202512 | nitroglycerin                         | 218416 | amiloride                               | 4603   | furosemide              |
| 202978 | pindolol                              | 3829   | enalaprilat                             | 37925  | orlistat                |
| 203138 | verapamil                             | 151195 | atenolol<br>/                           | 284747 | hydralazine             |

|        |                           |        |                                  |        |                     |
|--------|---------------------------|--------|----------------------------------|--------|---------------------|
|        | hydrochloride             |        | chlorthalidone                   |        |                     |
| 7396   | nicardipine               | 284747 | hydrochlorothiazide              | 218936 | hydrochlorothiazide |
| 327503 | olmesartan                | 688640 | methyldopa                       | 149    | acebutolol          |
| 745974 | bisoprolol                | 142132 | carteolol hydrochloride          | 219878 | hydrochlorothiazide |
| 69749  | valsartan                 | 219734 | minoxidil                        | 227549 | ethacrynate         |
| 153165 | atorvastatin              | 214223 | amlodipine / benazepril          | 21406  | coenzyme Q10        |
| 7435   | nisoldipine               | 203673 | guanethidine                     | 54552  | perindopril         |
| 216251 | bendroflumethiazide       | 214287 | benazepril / hydrochlorothiazide | 758548 | hydrochlorothiazide |
| 82027  | hydralazine hydrochloride | 203794 | metolazone                       | 542509 | timolol             |
| 823960 | losartan                  | 220005 | spironolactone                   | 83515  | eprosartan          |
| 823968 | lisinopril                | 746962 | timolol                          | 54980  | mibefradil          |

|        |                           |        |                     |        |                                 |
|--------|---------------------------|--------|---------------------|--------|---------------------------------|
| 700402 | aliskiren                 | 215868 | captopril           | 325646 | aliskiren                       |
| 217642 | hydrochlorothiazide       | 10601  | timolol             | 805852 | hydrochlorothiazide             |
| 745969 | bisoprolol                | 215871 | captopril           | 220675 | moexipril                       |
| 224931 | polythiazide              | 9631   | acebutolol          | 724888 | valsartan                       |
| 49737  | esmolol                   | 203191 | metoprolol tartrate | 744621 | amlodipine                      |
| 6984   | minoxidil                 | 823939 | irbesartan          | 6185   | labetalol                       |
| 405349 | diltiazem                 | 216252 | bendroflumethiazide | 40138  | iloprost                        |
| 809019 | hydrochlorothiazide       | 218753 | nitroprusside       | 744875 | benazepril                      |
| 219797 | hydroflumethiazide        | 220212 | atenolol            | 75207  | bosentan                        |
| 82084  | propranolol hydrochloride | 688640 | hydrochlorothiazide | 219881 | reserpine                       |
| 7476   | nitroprusside             | 220081 | nisoldipine         | 214536 | enalapril / hydrochlorothiazide |

|        |                                 |        |                     |        |                     |
|--------|---------------------------------|--------|---------------------|--------|---------------------|
|        |                                 |        |                     |        | zide                |
| 220212 | chlorthalidone                  | 5764   | indapamide          | 744625 | olmesartan          |
| 218856 | carteolol                       | 151448 | esmolol             | 215870 | captopril           |
| 744629 | olmesartan                      | 353022 | eprosartan          | 152440 | labetalol           |
| 227749 | trichlormethiazide              | 220778 | verapamil           | 809851 | hydrochlorothiazide |
| 203778 | phenoxybenzamine                | 218088 | benazepril          | 1520   | betaxolol           |
| 216652 | valsartan                       | 151131 | nifedipine          | 754809 | polythiazide        |
| 151318 | methyldopa                      | 750204 | atorvastatin        | 751613 | nebivolol           |
| 656315 | chlorthalidone                  | 750232 | atorvastatin        | 221002 | bisoprolol          |
| 220005 | hydrochlorothiazide             | 17276  | hydrochlorothiazide | 73494  | telmisartan         |
| 262418 | ramipril                        | 220309 | diltiazem           | 26296  | guanadrel           |
| 214622 | hydrochlorothiazide / moexipril | 541019 | captopril           | 71974  | torseamide          |



|        |                     |        |                                 |        |                      |
|--------|---------------------|--------|---------------------------------|--------|----------------------|
| 750208 | amlodipine          | 215868 | hydrochlorothiazide             | 71556  | guanfacine           |
| 24853  | fenoldopam          | 151435 | metoprolol                      | 823968 | hydrochlorothiazide  |
| 744883 | benazepril          | 214212 | amiloride / hydrochlorothiazide | 353022 | hydrochlorothiazide  |
| 52440  | triamterene         | 219868 | atenolol                        | 668310 | carvedilol phosphate |
| 750196 | amlodipine          | 491311 | nifedipine                      | 151133 | nifedipine           |
| 17276  | spironolactone      | 224921 | enalapril                       | 30131  | moexipril            |
| 402957 | metolazone          | 261438 | perindopril                     | 303263 | tadalafil            |
| 749838 | hydrochlorothiazide | 151317 | spironolactone                  | 151174 | nitroglycerin        |
| 724888 | amlodipine          | 744883 | amlodipine                      | 216909 | deserpidine          |
| 303838 | hydralazine         | 202693 | labetalol hydrochloride         | 58927  | amlodipine           |

|        |                                        |        |                             |        |                     |
|--------|----------------------------------------|--------|-----------------------------|--------|---------------------|
| 152380 | spironolactone                         | 1998   | captopril                   | 18867  | benazepril          |
| 1436   | bepiridil                              | 235758 | benazepril<br>hydrochloride | 8153   | phentolamine        |
| 35208  | quinapril                              | 218416 | hydrochlorothiazide         | 285061 | enalaprilat         |
| 203016 | felodipine                             | 203276 | hydrochlorothiazide         | 7442   | nitric<br>oxide     |
| 202706 | minoxidil                              | 151877 | chlorthalidone              | 991208 | bendroflumethiazide |
| 219882 | hydrochlorothiazide                    | 83213  | mibefradil                  | 52175  | losartan            |
| 151178 | nitroglycerin                          | 72260  | perindopril<br>erbumine     | 203538 | bumetanide          |
| 744633 | olmesartan                             | 2599   | clonidine                   | 3443   | diltiazem           |
| 261415 | fosinopril<br>/<br>hydrochlorothiazide | 809027 | hydrochlorothiazide         | 801793 | coenzyme<br>Q10     |
| 404773 | amlodipine                             | 219412 | lisinopril                  |        |                     |

/ atorvastatin

220391

hydrochlorothia

10772

zide

trichlormethiazi

de

**Supplemental Table 4: Clinical Note Counts and Extracted Hypertension Regular Expression Matches and Concepts.**

Our population had 43,262 notes with 28,264 PL, 14,072 HPC, and 926 DS. Problem lists were both the most numerous and the source resulting in the largest number of regular expression matches and concepts.

|                                                          | <b>All Document Types</b> | <b>Problem Lists</b> | <b>History &amp; Physicals/Clinic Notes</b> | <b>Discharge Summaries</b> |
|----------------------------------------------------------|---------------------------|----------------------|---------------------------------------------|----------------------------|
| <b>Note counts</b>                                       | 43262                     | 28264                | 14072                                       | 926                        |
| <b>Max per individual</b>                                | 356                       | 264                  | 142                                         | 29                         |
| <b>Min per individual</b>                                | 2                         | 0                    | 0                                           | 0                          |
| <b>Median per individual (IQR)</b>                       | 47 (25-92)                | 31 (14-60.5)         | 15 (8-29)                                   | 0 (0-2)                    |
| <b>hypertension regular expression match note counts</b> | 17392                     | 11557                | 5489                                        | 346                        |
| <b>Max per individual</b>                                | 265                       | 203                  | 88                                          | 10                         |
| <b>Min per individual</b>                                | 0                         | 0                    | 0                                           | 0                          |
| <b>Median per individual (IQR)</b>                       | 5 (1-38)                  | 0 (0-24)             | 3 (0-12)                                    | 0 (0-0)                    |
| <b>Concept counts</b>                                    | 11695623                  | 11441802             | 240452                                      | 13369                      |
| <b>Max per individual</b>                                | 598893                    | 594178               | 4585                                        | 412                        |
| <b>Min per individual</b>                                | 5                         | 0                    | 0                                           | 0                          |
| <b>Median per individual (IQR)</b>                       | 4356 (1086-16741)         | 4055 (947.5-16040)   | 230 (102-431.5)                             | 0 (0-24.5)                 |
| <b>Hypertension concept counts</b>                       | 401147                    | 393363               | 7332                                        | 452                        |
| <b>Max per individual</b>                                | 43056                     | 42787                | 256                                         | 17                         |
| <b>Min per individual</b>                                | 0                         | 0                    | 0                                           | 0                          |
| <b>Median per individual (IQR)</b>                       | 17 (0-523.5)              | 3 (0-495.5)          | 1 (0-15)                                    | 0 (0-0)                    |

IQR = Interquartile range

**Supplemental Table 5: Full Set of UMLS Hypertension Concepts**

| <b>CUI</b> | <b>CUI_PN</b>                                       |
|------------|-----------------------------------------------------|
| 1303117    | Moderate hypertension control (finding)             |
| 20540      | Hypertension, Malignant [Disease/Finding]           |
| 421190     | Poor hypertension control (finding)                 |
| 235222     | Diastolic hypertension (disorder)                   |
| 155583     | Benign essential hypertension (disorder)            |
| 421189     | Good hypertension control (finding)                 |
| 85580      | Hypertension, Essential                             |
| 20538      | Hypertensive disorder, systemic arterial (disorder) |
| 264637     | Benign hypertension (disorder)                      |
| 221155     | systolic hypertension                               |
| 1541808    | Hypertension (& [essential])                        |
| 455527     | History of - hypertension (situation)               |

**Supplemental Table 6: Feature Comparison Between Cases and Controls**

| Feature                                          | Cases   |                     | Controls |                     |
|--------------------------------------------------|---------|---------------------|----------|---------------------|
|                                                  | Median  | IQR                 | Median   | IQR                 |
| date-ICD9 count                                  | 136.00  | (75.00-271.50)      | 65.00    | (33.75-139.00)      |
| unique ICD9 count                                | 51.00   | (29.00-82.00)       | 32.50    | (16.00-54.25)       |
| hypertension ICD9 count                          | 7.00    | (1.00-18.00)        | 0.00     | (0.00-0.00)         |
| unique hypertension ICD9 count                   | 2.00    | (1.00-2.00)         | 0.00     | (0.00-0.00)         |
| hypertension ICD9 count normalized               | 0.05    | (0.01-0.10)         | 0.00     | (0.00-0.00)         |
| hypertension ICD9 count unique normalized        | 0.13    | (0.04-0.29)         | 0.00     | (0.00-0.00)         |
| unique hypertension ICD9 count normalized        | 0.01    | (0.00-0.02)         | 0.00     | (0.00-0.00)         |
| unique hypertension ICD9 count unique normalized | 0.02    | (0.01-0.04)         | 0.00     | (0.00-0.00)         |
| meds count                                       | 462.00  | (206.50-1,017.00)   | 135.00   | (60.75-346.25)      |
| unique meds count                                | 84.00   | (43.50-147.00)      | 41.50    | (20.00-76.00)       |
| hypertension meds count                          | 61.00   | (21.50-174.00)      | 0.00     | (0.00-5.00)         |
| unique hypertension meds count                   | 7.00    | (3.00-13.00)        | 0.00     | (0.00-2.00)         |
| hypertension meds count normalized               | 0.15    | (0.08-0.22)         | 0.00     | (0.00-0.02)         |
| hypertension meds count unique normalized        | 0.84    | (0.35-1.66)         | 0.00     | (0.00-0.06)         |
| unique hypertension meds count normalized        | 0.01    | (0.01-0.03)         | 0.00     | (0.00-0.01)         |
| unique hypertension meds count unique normalized | 0.09    | (0.05-0.14)         | 0.00     | (0.00-0.03)         |
| max age                                          | 65.00   | (56.00-75.00)       | 47.00    | (37.00-60.00)       |
| vital reading time span (days)                   | 2412.00 | (1,808.50-3,227.00) | 2081.00  | (1,209.75-2,824.25) |
| visits with vitals count (days)                  | 30.00   | (16.00-52.00)       | 17.00    | (9.00-30.00)        |
| hypertensive BP count (days)                     | 9.00    | (4.00-18.00)        | 1.00     | (0.00-3.00)         |
| median systolic (all)                            | 131.00  | (124.00-138.00)     | 120.00   | (110.00-125.00)     |
| median diastolic (all)                           | 76.00   | (70.00-80.00)       | 72.00    | (68.00-78.00)       |
| hypertensive BP count normalized                 | 0.34    | (0.19-0.51)         | 0.04     | (0.00-0.20)         |
| vitals density                                   | 0.01    | (0.01-0.02)         | 0.01     | (0.01-0.02)         |
| outpatient visits with vitals count (days)       | 19.00   | (9.00-29.50)        | 10.00    | (5.00-18.00)        |
| outpatient hypertensive BP count (days)          | 6.00    | (2.00-10.50)        | 0.00     | (0.00-2.00)         |
| median systolic (outpatient)                     | 131.00  | (124.00-140.00)     | 120.00   | (111.75-126.00)     |
| median diastolic (outpatient)                    | 76.00   | (70.00-81.50)       | 72.25    | (69.38-79.50)       |
| outpatient hypertensive BP count normalized      | 0.34    | (0.17-0.56)         | 0.00     | (0.00-0.18)         |
| outpatient vitals density                        | 0.01    | (0.00-0.01)         | 0.01     | (0.00-0.01)         |
| inpatient visits with vitals count (days)        | 11.00   | (4.00-21.50)        | 6.00     | (2.00-13.25)        |
| inpatient hypertensive BP count (days)           | 3.00    | (1.00-7.00)         | 0.00     | (0.00-1.00)         |
| median systolic (inpatient)                      | 130.00  | (121.00-138.00)     | 118.00   | (108.00-125.00)     |
| median diastolic (inpatient)                     | 74.00   | (67.00-80.00)       | 70.00    | (65.38-76.00)       |
| inpatient hypertensive BP count normalized       | 0.28    | (0.06-0.50)         | 0.00     | (0.00-0.14)         |
| inpatient vitals density                         | 0.004   | (0.002-0.010)       | 0.003    | (0.001-0.007)       |
| median pulse (all)                               | 75.00   | (70.00-83.00)       | 76.50    | (72.00-83.00)       |
| median pulse (outpatient)                        | 75.00   | (69.00-82.50)       | 76.00    | (71.00-81.13)       |
| median pulse (inpatient)                         | 76.00   | (68.38-84.00)       | 76.00    | (68.00-84.00)       |
| PL count                                         | 41.00   | (20.00-72.50)       | 22.00    | (11.00-41.25)       |

|                                                              |         |                      |         |                   |
|--------------------------------------------------------------|---------|----------------------|---------|-------------------|
| <b>DS count</b>                                              | 1.00    | (0.00-2.00)          | 0.00    | (0.00-1.00)       |
| <b>HPC count</b>                                             | 21.00   | (11.00-34.00)        | 11.50   | (6.00-18.00)      |
| <b>All doc count</b>                                         | 62.00   | (32.00-108.00)       | 35.00   | (18.00-64.75)     |
| <b>PL hypertension RegEx doc matches</b>                     | 18.00   | (1.00-42.50)         | 0.00    | (0.00-0.00)       |
| <b>DS hypertension RegEx doc matches</b>                     | 0.00    | (0.00-1.00)          | 0.00    | (0.00-0.00)       |
| <b>HPC hypertension RegEx doc matches</b>                    | 9.00    | (3.00-18.00)         | 0.00    | (0.00-2.00)       |
| <b>All doc hypertension RegEx doc matches</b>                | 29.00   | (7.00-63.00)         | 0.00    | (0.00-2.00)       |
| <b>PL hypertension RegEx doc matches doc normalized</b>      | 0.67    | (0.07-0.85)          | 0.00    | (0.00-0.00)       |
| <b>DS hypertension RegEx doc matches doc normalized</b>      | 0.00    | (0.00-0.50)          | 0.00    | (0.00-0.00)       |
| <b>HPC hypertension RegEx doc matches doc normalized</b>     | 0.55    | (0.20-0.78)          | 0.00    | (0.00-0.16)       |
| <b>All doc hypertension RegEx doc matches doc normalized</b> | 0.62    | (0.20-0.78)          | 0.00    | (0.00-0.06)       |
| <b>PL concept count</b>                                      | 7346.00 | (2,099.00-23,406.00) | 1526.50 | (381.75-6,951.75) |
| <b>DS concept count</b>                                      | 4.00    | (0.00-35.00)         | 0.00    | (0.00-12.00)      |
| <b>HPC concept count</b>                                     | 298.00  | (156.00-591.00)      | 137.50  | (61.75-273.75)    |
| <b>All doc concept count</b>                                 | 7650.00 | (2,459.00-24,003.50) | 1709.50 | (499.75-7,162.25) |
| <b>PL hypertension concept count</b>                         | 325.00  | (34.00-999.00)       | 0.00    | (0.00-0.00)       |
| <b>DS hypertension concept count</b>                         | 0.00    | (0.00-1.00)          | 0.00    | (0.00-0.00)       |
| <b>HPC hypertension concept count</b>                        | 11.00   | (2.00-25.50)         | 0.00    | (0.00-0.00)       |
| <b>All doc hypertension concept count</b>                    | 335.00  | (39.50-1,019.50)     | 0.00    | (0.00-0.00)       |
| <b>PL hypertension concept count doc normalized</b>          | 11.14   | (1.78-18.44)         | 0.00    | (0.00-0.00)       |
| <b>DS hypertension concept count doc normalized</b>          | 0.00    | (0.00-0.50)          | 0.00    | (0.00-0.00)       |
| <b>HPC hypertension concept count doc normalized</b>         | 0.60    | (0.16-1.00)          | 0.00    | (0.00-0.00)       |
| <b>All doc hypertension concept count doc normalized</b>     | 7.10    | (1.38-12.37)         | 0.00    | (0.00-0.00)       |
| <b>PL hypertension concept count concept normalized</b>      | 0.05    | (0.01-0.09)          | 0.00    | (0.00-0.00)       |
| <b>DS hypertension concept count concept normalized</b>      | 0.00    | (0.00-0.03)          | 0.00    | (0.00-0.00)       |
| <b>HPC hypertension concept count concept normalized</b>     | 0.04    | (0.01-0.06)          | 0.00    | (0.00-0.00)       |
| <b>All doc hypertension concept count concept normalized</b> | 0.05    | (0.02-0.08)          | 0.00    | (0.00-0.00)       |

**Supplemental Table 7: Full Result Table Including AUC, Sensitivity, and PPV Across Individual Inputs, Simple Algorithms, and Random Forests.**

| Feature                                          | Inputs | Binary Threshold (Present/Absent) |               |             |               |        |               |
|--------------------------------------------------|--------|-----------------------------------|---------------|-------------|---------------|--------|---------------|
|                                                  |        | AUC                               |               | Sensitivity |               | PPV    |               |
|                                                  |        | Median                            | (CI)          | Median      | (CI)          | Median | (CI)          |
| date-ICD9 count                                  |        | 0.686                             | (0.656-0.766) | 1.000       | (0.991-1)     | 0.566  | (0.535-0.638) |
| unique ICD9 count                                |        | 0.643                             | (0.624-0.71)  | 0.991       | (0.973-1)     | 0.570  | (0.533-0.638) |
| hypertension ICD9 count                          |        | 0.908                             | (0.902-0.911) | 0.841       | (0.823-0.85)  | 0.947  | (0.918-0.979) |
| unique hypertension ICD9 count                   |        | 0.898                             | (0.894-0.906) | 0.841       | (0.823-0.85)  | 0.947  | (0.918-0.979) |
| hypertension ICD9 count normalized               |        | 0.907                             | (0.901-0.911) | 0.841       | (0.823-0.85)  | 0.947  | (0.918-0.979) |
| hypertension ICD9 count unique normalized        |        | 0.909                             | (0.903-0.913) | 0.841       | (0.823-0.85)  | 0.947  | (0.918-0.979) |
| unique hypertension ICD9 count normalized        |        | 0.890                             | (0.884-0.904) | 0.841       | (0.823-0.85)  | 0.947  | (0.918-0.979) |
| unique hypertension ICD9 count unique normalized |        | 0.894                             | (0.891-0.907) | 0.841       | (0.823-0.85)  | 0.947  | (0.918-0.979) |
| meds count                                       |        | 0.745                             | (0.725-0.799) | 0.992       | (0.991-1)     | 0.566  | (0.535-0.636) |
| unique meds count                                |        | 0.699                             | (0.673-0.754) | 0.992       | (0.991-1)     | 0.566  | (0.535-0.633) |
| hypertension meds count                          |        | 0.907                             | (0.881-0.916) | 0.944       | (0.92-0.961)  | 0.759  | (0.727-0.813) |
| unique hypertension meds count                   |        | 0.887                             | (0.85-0.909)  | 0.944       | (0.92-0.961)  | 0.759  | (0.727-0.813) |
| hypertension meds count normalized               |        | 0.900                             | (0.876-0.918) | 0.944       | (0.92-0.961)  | 0.759  | (0.727-0.813) |
| hypertension meds count unique normalized        |        | 0.910                             | (0.883-0.922) | 0.944       | (0.92-0.961)  | 0.759  | (0.727-0.813) |
| unique hypertension meds count normalized        |        | 0.838                             | (0.783-0.853) | 0.944       | (0.92-0.961)  | 0.759  | (0.727-0.813) |
| unique hypertension meds count unique normalized |        | 0.890                             | (0.844-0.902) | 0.944       | (0.92-0.961)  | 0.759  | (0.727-0.813) |
| max age                                          |        | 0.785                             | (0.761-0.811) | 1.000       | (1-1)         | 0.568  | (0.538-0.638) |
| vital reading time span (days)                   |        | 0.600                             | (0.567-0.648) | 0.992       | (0.991-1)     | 0.563  | (0.533-0.633) |
| visits with vitals count (days)                  |        | 0.666                             | (0.661-0.733) | 1.000       | (0.984-1)     | 0.568  | (0.538-0.638) |
| hypertensive BP count (days)                     |        | 0.854                             | (0.847-0.874) | 0.953       | (0.944-0.964) | 0.701  | (0.662-0.742) |
| median systolic (all)                            |        | 0.802                             | (0.774-0.814) | 1.000       | (1-1)         | 0.571  | (0.538-0.638) |
| median diastolic (all)                           |        | 0.591                             | (0.544-0.62)  | 0.992       | (0.981-1)     | 0.568  | (0.53-0.633)  |
| hypertensive BP count normalized                 |        | 0.825                             | (0.809-0.85)  | 0.953       | (0.944-0.964) | 0.701  | (0.662-0.742) |
| vitals density                                   |        | 0.621                             | (0.566-0.642) | 1.000       | (0.991-1)     | 0.563  | (0.538-0.638) |
| outpatient visits with vitals count (days)       |        | 0.685                             | (0.665-       | 0.981       | (0.965-       | 0.565  | (0.536-       |



|                                                       |       |               |       |               |       |               |
|-------------------------------------------------------|-------|---------------|-------|---------------|-------|---------------|
|                                                       |       | 0.744)        |       | 0.991)        |       | 0.629)        |
| outpatient hypertensive BP count (days)               | 0.841 | (0.823-0.859) | 0.897 | (0.89-0.909)  | 0.713 | (0.691-0.748) |
| median systolic (outpatient)                          | 0.775 | (0.748-0.787) | 0.981 | (0.965-0.991) | 0.565 | (0.536-0.629) |
| median diastolic (outpatient)                         | 0.578 | (0.507-0.615) | 0.981 | (0.965-0.991) | 0.565 | (0.536-0.629) |
| outpatient hypertensive BP count normalized           | 0.798 | (0.758-0.829) | 0.897 | (0.89-0.909)  | 0.713 | (0.691-0.748) |
| outpatient vitals density                             | 0.629 | (0.6-0.66)    | 0.981 | (0.965-0.991) | 0.565 | (0.536-0.629) |
| inpatient visits with vitals count (days)             | 0.624 | (0.608-0.691) | 0.953 | (0.935-0.964) | 0.563 | (0.548-0.637) |
| inpatient hypertensive BP count (days)                | 0.763 | (0.749-0.819) | 0.752 | (0.738-0.832) | 0.759 | (0.712-0.798) |
| median systolic (inpatient)                           | 0.736 | (0.721-0.764) | 0.953 | (0.935-0.964) | 0.563 | (0.548-0.637) |
| median diastolic (inpatient)                          | 0.591 | (0.561-0.597) | 0.953 | (0.935-0.964) | 0.563 | (0.548-0.637) |
| inpatient hypertensive BP count normalized            | 0.741 | (0.734-0.799) | 0.752 | (0.738-0.832) | 0.759 | (0.712-0.798) |
| inpatient vitals density                              | 0.593 | (0.582-0.649) | 0.953 | (0.935-0.964) | 0.563 | (0.548-0.637) |
| median pulse (all)                                    | 0.435 | (0.393-0.473) | 0.992 | (0.991-1)     | 0.563 | (0.533-0.633) |
| median pulse (outpatient)                             | 0.450 | (0.439-0.498) | 0.981 | (0.965-0.991) | 0.568 | (0.538-0.633) |
| median pulse (inpatient)                              | 0.486 | (0.439-0.498) | 0.944 | (0.921-0.956) | 0.571 | (0.54-0.626)  |
| PL count                                              | 0.670 | (0.628-0.732) | 0.992 | (0.991-1)     | 0.566 | (0.533-0.633) |
| DS count                                              | 0.611 | (0.567-0.677) | 0.558 | (0.449-0.591) | 0.697 | (0.615-0.743) |
| HPC count                                             | 0.670 | (0.616-0.728) | 0.981 | (0.965-0.984) | 0.556 | (0.533-0.635) |
| All doc count                                         | 0.674 | (0.63-0.739)  | 0.992 | (0.984-1)     | 0.571 | (0.538-0.631) |
| PL hypertension RegEx doc matches                     | 0.855 | (0.842-0.868) | 0.757 | (0.72-0.787)  | 0.943 | (0.92-0.952)  |
| DS hypertension RegEx doc matches                     | 0.676 | (0.627-0.696) | 0.389 | (0.299-0.394) | 0.952 | (0.889-1)     |
| HPC hypertension RegEx doc matches                    | 0.844 | (0.812-0.879) | 0.900 | (0.879-0.916) | 0.731 | (0.676-0.793) |
| All doc hypertension RegEx doc matches                | 0.896 | (0.875-0.921) | 0.950 | (0.935-0.963) | 0.725 | (0.685-0.796) |
| PL hypertension RegEx doc matches doc normalized      | 0.852 | (0.837-0.87)  | 0.757 | (0.72-0.787)  | 0.943 | (0.92-0.952)  |
| DS hypertension RegEx doc matches doc normalized      | 0.677 | (0.63-0.696)  | 0.389 | (0.299-0.394) | 0.952 | (0.889-1)     |
| HPC hypertension RegEx doc matches doc normalized     | 0.840 | (0.8-0.861)   | 0.900 | (0.879-0.916) | 0.731 | (0.676-0.793) |
| All doc hypertension RegEx doc matches doc normalized | 0.903 | (0.877-0.92)  | 0.950 | (0.935-0.963) | 0.725 | (0.685-0.796) |
| PL concept count                                      | 0.710 | (0.687-0.751) | 1.000 | (0.984-1)     | 0.568 | (0.538-0.631) |
| DS concept count                                      | 0.611 | (0.577-0.681) | 0.527 | (0.439-0.567) | 0.697 | (0.618-0.742) |
| HPC concept count                                     | 0.690 | (0.665-       | 0.976 | (0.965-1)     | 0.556 | (0.531-       |

|                                                                         |         |               |         |               |         |               |
|-------------------------------------------------------------------------|---------|---------------|---------|---------------|---------|---------------|
|                                                                         |         | 0.763)        |         |               |         | 0.633)        |
| All doc concept count                                                   | 0.709   | (0.692-0.755) | 1.000   | (0.992-1)     | 0.568   | (0.538-0.633) |
| PL hypertension concept count                                           | 0.856   | (0.851-0.868) | 0.782   | (0.752-0.795) | 0.931   | (0.919-0.944) |
| DS hypertension concept count                                           | 0.661   | (0.614-0.682) | 0.346   | (0.271-0.364) | 0.948   | (0.879-1)     |
| HPC hypertension concept count                                          | 0.883   | (0.877-0.911) | 0.841   | (0.823-0.879) | 0.891   | (0.849-0.894) |
| All doc hypertension concept count                                      | 0.908   | (0.89-0.933)  | 0.906   | (0.897-0.944) | 0.863   | (0.828-0.885) |
| PL hypertension concept count doc normalized                            | 0.860   | (0.855-0.871) | 0.782   | (0.752-0.795) | 0.931   | (0.919-0.944) |
| DS hypertension concept count doc normalized                            | 0.663   | (0.617-0.682) | 0.346   | (0.271-0.364) | 0.948   | (0.879-1)     |
| HPC hypertension concept count doc normalized                           | 0.886   | (0.881-0.914) | 0.841   | (0.823-0.879) | 0.891   | (0.849-0.894) |
| All doc hypertension concept count doc normalized                       | 0.914   | (0.901-0.938) | 0.906   | (0.897-0.944) | 0.863   | (0.828-0.885) |
| PL hypertension concept count concept normalized                        | 0.869   | (0.851-0.877) | 0.782   | (0.752-0.795) | 0.931   | (0.919-0.944) |
| DS hypertension concept count concept normalized                        | 0.661   | (0.617-0.682) | 0.346   | (0.271-0.364) | 0.948   | (0.879-1)     |
| HPC hypertension concept count concept normalized                       | 0.887   | (0.879-0.914) | 0.841   | (0.823-0.879) | 0.891   | (0.849-0.894) |
| All doc hypertension concept count concept normalized                   | 0.914   | (0.909-0.942) | 0.906   | (0.897-0.944) | 0.863   | (0.828-0.885) |
| Sum of hypertension ICD9 and meds                                       | 0.92358 | (0.894-0.95)  | 0.96748 | (0.945-1)     | 0.77397 | (0.718-0.83)  |
| Sum of normalized hypertension ICD9 and meds                            | 0.92961 | (0.901-0.954) | 0.96748 | (0.945-1)     | 0.77397 | (0.718-0.83)  |
| Sum of unique normalized hypertension ICD9 and meds                     | 0.92808 | (0.901-0.951) | 0.96748 | (0.945-1)     | 0.77397 | (0.718-0.83)  |
| Sum of hypertension ICD9 and BP                                         | 0.9202  | (0.885-0.947) | 0.98214 | (0.959-1)     | 0.70988 | (0.644-0.767) |
| Sum of normalized hypertension ICD9 and BP                              | 0.86057 | (0.827-0.903) | 0.98214 | (0.959-1)     | 0.70988 | (0.644-0.767) |
| Sum of unique normalized hypertension ICD9 and BP                       | 0.8961  | (0.867-0.93)  | 0.98214 | (0.959-1)     | 0.70988 | (0.644-0.767) |
| Sum of hypertension meds and BP                                         | 0.92954 | (0.895-0.956) | 1       | (1-1)         | 0.67251 | (0.608-0.731) |
| Sum of normalized hypertension meds and BP                              | 0.89672 | (0.866-0.929) | 1       | (1-1)         | 0.67251 | (0.608-0.731) |
| Sum of unique normalized hypertension meds and BP                       | 0.93979 | (0.913-0.967) | 1       | (1-1)         | 0.67251 | (0.608-0.731) |
| Sum of hypertension ICD9, meds, and BP                                  | 0.93547 | (0.903-0.961) | 1       | (1-1)         | 0.67251 | (0.608-0.731) |
| Sum of normalized hypertension ICD9, meds, and BP                       | 0.91513 | (0.888-0.942) | 1       | (1-1)         | 0.67251 | (0.608-0.731) |
| Sum of unique normalized hypertension ICD9, meds, and BP                | 0.94757 | (0.923-0.971) | 1       | (1-1)         | 0.67251 | (0.608-0.731) |
| Sum of hypertension ICD9, meds, BP, and RegEx                           | 0.940   | (0.906-0.961) | 1.000   | (1-1)         | 0.631   | (0.574-0.699) |
| Sum of hypertension ICD9, meds, BP, and RegEx normalized                | 0.940   | (0.912-0.96)  | 1.000   | (1-1)         | 0.631   | (0.574-0.699) |
| Sum of normalized hypertension ICD9, meds, BP, and RegEx doc normalized | 0.953   | (0.932-0.969) | 1.000   | (1-1)         | 0.631   | (0.574-0.699) |
| Sum of unique normalized hypertension ICD9, meds, BP, and RegEx         | 0.959   | (0.935-       | 1.000   | (1-1)         | 0.631   | (0.574-       |

|                                                                                       |         |         |         |           |         |           |
|---------------------------------------------------------------------------------------|---------|---------|---------|-----------|---------|-----------|
| doc normalized                                                                        |         | 0.977)  |         |           |         | 0.699)    |
|                                                                                       |         | (0.91-  |         |           |         | (0.609-   |
| Sum of hypertension ICD9, meds, BP, and concepts                                      | 0.936   | 0.961)  | 1.000   | (1-1)     | 0.663   | 0.734)    |
|                                                                                       |         | (0.912- |         |           |         | (0.609-   |
| Sum of hypertension ICD9, meds, BP, and concepts normalized                           | 0.941   | 0.964)  | 1.000   | (1-1)     | 0.663   | 0.734)    |
|                                                                                       |         | (0.911- |         |           |         | (0.609-   |
| Sum of hypertension ICD9, meds, BP, and concepts doc normalized                       | 0.940   | 0.965)  | 1.000   | (1-1)     | 0.663   | 0.734)    |
|                                                                                       |         | (0.897- |         |           |         | (0.609-   |
| Sum of normalized hypertension ICD9, meds, BP, and concepts concept normalized        | 0.929   | 0.955)  | 1.000   | (1-1)     | 0.663   | 0.734)    |
|                                                                                       |         | (0.92-  |         |           |         | (0.609-   |
| Sum of unique normalized hypertension ICD9, meds, BP, and concepts doc normalized     | 0.949   | 0.971)  | 1.000   | (1-1)     | 0.663   | 0.734)    |
|                                                                                       |         | (0.925- |         |           |         | (0.609-   |
| Sum of unique normalized hypertension ICD9, meds, BP, and concepts concept normalized | 0.953   | 0.977)  | 1.000   | (1-1)     | 0.663   | 0.734)    |
|                                                                                       |         | (0.893- |         |           |         | (0.718-   |
| Count of hypertensive ICD9 and med                                                    | 0.92323 | 0.951)  | 0.96748 | (0.945-1) | 0.77397 | 0.83)     |
|                                                                                       |         | (0.742- |         |           |         | (0.718-   |
| Count of hypertensive ICD9 and med 1 of 2                                             | 0.78711 | 0.821)  | 0.96748 | (0.945-1) | 0.77397 | 0.83)     |
|                                                                                       |         | (0.85-  |         |           |         | (0.923-   |
| Count of hypertensive ICD9 and med 2 of 2                                             | 0.88169 | 0.921)  | 0.82143 | 0.882)    | 0.95699 | 0.989)    |
|                                                                                       |         | (0.881- |         |           |         | (0.644-   |
| Count of hypertensive ICD9 and BP                                                     | 0.90879 | 0.939)  | 0.98214 | (0.959-1) | 0.70988 | 0.767)    |
|                                                                                       |         | (0.659- |         |           |         | (0.644-   |
| Count of hypertensive ICD9 and BP 1 of 2                                              | 0.70373 | 0.74)   | 0.98214 | (0.959-1) | 0.70988 | 0.767)    |
|                                                                                       |         | (0.851- |         |           |         | (0.915-   |
| Count of hypertensive ICD9 and BP 2 of 2                                              | 0.87786 | 0.912)  | 0.81452 | 0.871)    | 0.95745 | 0.981)    |
|                                                                                       |         | (0.805- |         |           |         | (0.608-   |
| Count of hypertensive med and BP                                                      | 0.83929 | 0.878)  | 1       | (1-1)     | 0.67251 | 0.731)    |
|                                                                                       |         | (0.62-  |         |           |         | (0.608-   |
| Count of hypertensive med and BP 1 of 2                                               | 0.65789 | 0.69)   | 1       | (1-1)     | 0.67251 | 0.731)    |
|                                                                                       |         | (0.785- |         |           |         | (0.779-   |
| Count of hypertensive med and BP 2 of 2                                               | 0.82473 | 0.87)   | 0.91228 | 0.948)    | 0.83206 | 0.879)    |
|                                                                                       |         | (0.913- |         |           |         | (0.608-   |
| Count of hypertensive ICD9, med, and BP                                               | 0.93462 | 0.962)  | 1       | (1-1)     | 0.67251 | 0.731)    |
|                                                                                       |         | (0.62-  |         |           |         | (0.608-   |
| Count of hypertensive ICD9, med, and BP 1 of 3                                        | 0.65789 | 0.69)   | 1       | (1-1)     | 0.67251 | 0.731)    |
|                                                                                       |         | (0.788- |         |           |         | (0.77-    |
| Count of hypertensive ICD9, med, and BP 2 of 3                                        | 0.83275 | 0.868)  | 0.95161 | 0.983)    | 0.82222 | 0.872)    |
|                                                                                       |         | (0.849- |         |           |         | (0.937-   |
| Count of hypertensive ICD9, med, and BP 3 of 3                                        | 0.87691 | 0.914)  | 0.79832 | 0.86)     | 0.96739 | 0.99)     |
|                                                                                       |         | (0.905- |         |           |         | (0.574-   |
| Count of hypertensive ICD9, med, BP, and RegEx                                        | 0.944   | 0.965)  | 1.000   | (1-1)     | 0.631   | 0.699)    |
|                                                                                       |         | (0.557- |         |           |         | (0.574-   |
| Count of hypertensive ICD9, med, BP, and RegEx 1 of 4                                 | 0.588   | 0.613)  | 1.000   | (1-1)     | 0.631   | 0.699)    |
|                                                                                       |         | (0.723- |         |           |         | (0.703-   |
| Count of hypertensive ICD9, med, BP, and RegEx 2 of 4                                 | 0.764   | 0.81)   | 0.983   | (0.965-1) | 0.750   | 0.819)    |
|                                                                                       |         | (0.824- |         |           |         | (0.828-   |
| Count of hypertensive ICD9, med, BP, and RegEx 3 of 4                                 | 0.874   | 0.908)  | 0.927   | 0.958)    | 0.878   | 0.925)    |
|                                                                                       |         | (0.836- |         |           |         | (0.938-1) |
| Count of hypertensive ICD9, med, BP, and RegEx 4 of 4                                 | 0.879   | 0.914)  | 0.795   | 0.856)    | 0.969   |           |
|                                                                                       |         | (0.911- |         |           |         | (0.609-   |
| Count of hypertensive ICD9, med, BP, and concept                                      | 0.951   | 0.971)  | 1.000   | (1-1)     | 0.663   | 0.734)    |
|                                                                                       |         | (0.602- |         |           |         | (0.609-   |
| Count of hypertensive ICD9, med, BP, and concept 1 of 4                               | 0.640   | 0.686)  | 1.000   | (1-1)     | 0.663   | 0.734)    |
|                                                                                       |         | (0.751- |         |           |         | (0.732-   |
| Count of hypertensive ICD9, med, BP, and concept 2 of 4                               | 0.802   | 0.854)  | 0.974   | 0.992)    | 0.784   | 0.862)    |
|                                                                                       |         | (0.868- |         |           |         | (0.882-   |
| Count of hypertensive ICD9, med, BP, and concept 3 of 4                               | 0.910   | 0.936)  | 0.925   | 0.958)    | 0.924   | 0.966)    |
|                                                                                       |         | (0.832- |         |           |         | (0.937-1) |
| Count of hypertensive ICD9, med, BP, and concept 4 of 4                               | 0.875   |         | 0.785   | (0.71-    | 0.969   |           |

|                                                                                  |       |               |       |           |       |               |
|----------------------------------------------------------------------------------|-------|---------------|-------|-----------|-------|---------------|
|                                                                                  |       | 0.906)        |       | 0.846)    |       |               |
| ICD9 category (random forest)                                                    | 0.899 | (0.864-0.927) | 0.984 | (0.953-1) | 0.615 | (0.553-0.683) |
| meds category (random forest)                                                    | 0.888 | (0.848-0.924) | 0.982 | (0.951-1) | 0.627 | (0.553-0.693) |
| vitals category (random forest)                                                  | 0.865 | (0.823-0.917) | 1.000 | (1-1)     | 0.588 | (0.538-0.638) |
| RegEx category (random forest)                                                   | 0.900 | (0.861-0.933) | 1.000 | (0.982-1) | 0.622 | (0.558-0.689) |
| concept category (random forest)                                                 | 0.928 | (0.895-0.953) | 1.000 | (0.983-1) | 0.594 | (0.536-0.653) |
| ICD9, meds, all BP (random forest)                                               | 0.955 | (0.934-0.975) | 1.000 | (0.992-1) | 0.624 | (0.55-0.692)  |
| ICD9, meds, vitals (all, outpatient, inpatient) (random forest)                  | 0.961 | (0.938-0.98)  | 1.000 | (1-1)     | 0.603 | (0.54-0.667)  |
| ICD9, meds, vitals (all, outpatient, inpatient), RegEx (random forest)           | 0.967 | (0.948-0.985) | 1.000 | (1-1)     | 0.601 | (0.543-0.655) |
| ICD9, meds, vitals (all, outpatient, inpatient), concept (random forest)         | 0.976 | (0.95-0.984)  | 1.000 | (1-1)     | 0.579 | (0.523-0.649) |
| ICD9, meds, vitals (all, outpatient, inpatient), RegEx, concepts (random forest) | 0.968 | (0.951-0.985) | 1.000 | (1-1)     | 0.596 | (0.544-0.67)  |

**Supplemental Table 8: Full Set of Comparisons Between Mean and Median of Correctly and Incorrectly Classified**

**Individuals.**

This table contains the absolute average difference (Avg. Diff) and median difference (Med. Diff.) between true negatives and false negatives (TN-FN), false positives and true positives (FP-TP), false negatives and true positives (FN-TP), and true negatives and false positives (TN-FP). The feature identifiers are along the left side and large difference values highlight features that are very different between the sets compared. All cells where at least one of the items was zero are listed as 'N/A'.

| Category<br>Measures                             | TN-FN     |            | FP-TP     |            | FN-TP     |            | TN-FP     |            |
|--------------------------------------------------|-----------|------------|-----------|------------|-----------|------------|-----------|------------|
|                                                  | Avg. Diff | Med. Diff. |
| date-ICD9 count                                  | 1.6       | 1.8        | 415.5     | 1.0        | 29.6      | 1.0        | 22.6      | 3.7        |
| unique ICD9 count                                | 1.6       | 1.3        | 149.9     | 1.0        | 8.6       | 1.0        | 11.0      | 4.6        |
| hypertension ICD9 count                          | N/A       | N/A        | 2.9       | 1.0        | N/A       | N/A        | N/A       | N/A        |
| unique hypertension ICD9 count                   | N/A       | N/A        | 15.9      | 1.0        | N/A       | N/A        | N/A       | N/A        |
| hypertension ICD9 count normalized               | N/A       | N/A        | 695.9     | 1.0        | N/A       | N/A        | N/A       | N/A        |
| hypertension ICD9 count unique normalized        | N/A       | N/A        | 230.6     | 1.0        | N/A       | N/A        | N/A       | N/A        |
| unique hypertension ICD9 count normalized        | N/A       | N/A        | 7694.8    | 1.0        | N/A       | N/A        | N/A       | N/A        |
| unique hypertension ICD9 count unique normalized | N/A       | N/A        | 2307.3    | 1.0        | N/A       | N/A        | N/A       | N/A        |
| meds count                                       | 1.3       | 11.9       | 1460.3    | 1.0        | 33.0      | 1.0        | 57.8      | 1.8        |
| unique meds count                                | 1.9       | 2.5        | 182.1     | 1.0        | 8.4       | 1.0        | 11.6      | 2.2        |
| hypertension meds count                          | 4.7       | N/A        | 44.7      | 1.0        | 2.0       | 1.0        | 102.2     | N/A        |
| unique hypertension meds count                   | 4.0       | N/A        | 5.5       | 1.0        | 1.0       | 1.0        | 22.0      | N/A        |
| hypertension meds count normalized               | 3.6       | N/A        | 45.0      | 1.0        | 22.2      | 1.0        | 1.8       | N/A        |
| hypertension meds count unique normalized        | 8.7       | N/A        | 4.1       | 1.0        | 4.2       | 1.0        | 8.8       | N/A        |
| unique hypertension meds count normalized        | 3.1       | N/A        | 744.5     | 1.0        | 92.5      | 1.0        | 2.6       | N/A        |
| unique hypertension meds count unique normalized | 7.4       | N/A        | 65.0      | 1.0        | 16.6      | 1.0        | 1.9       | N/A        |
| max age (by last vital)                          | 1.3       | 1.0        | 43.5      | 1.0        | 59.4      | 1.0        | 1.0       | 1.3        |
| vital reading time span (days)                   | 1.4       | 1.4        | 4015.4    | 1.0        | 2861.7    | 1.0        | 2.0       | 1.1        |
| visits with vitals count (days)                  | 1.8       | 1.3        | 69.0      | 1.0        | 8.4       | 1.0        | 14.4      | 4.8        |
| hypertensive BP count (days)                     | 3.0       | 5.0        | 5.1       | 1.0        | 5.1       | 1.0        | 8.7       | 1.5        |
| median systolic (all)                            | 1.0       | 1.1        | 113.3     | 1.0        | 120.2     | 1.0        | 1.1       | 1.1        |
| median diastolic (all)                           | 1.2       | 1.0        | 70.1      | 1.0        | 65.3      | 1.0        | 1.1       | 1.0        |
| hypertensive BP count normalized                 | 5.3       | 4.0        | 14.6      | 1.0        | 46.2      | 1.0        | 1.7       | 3.2        |
| vitals density                                   | 1.2       | 1.1        | 68.5      | 1.0        | 401.2     | 1.0        | 7.2       | 5.5        |
| outpatient visits with vitals count (days)       | 2.0       | 1.2        | 50.1      | 1.0        | 7.7       | 1.0        | 13.0      | 3.8        |
| outpatient hypertensive BP count (days)          | 2.0       | 3.6        | 4.0       | 1.0        | 4.5       | 1.0        | 9.0       | 1.3        |

|                                                                          |      |      |         |     |        |     |       |      |
|--------------------------------------------------------------------------|------|------|---------|-----|--------|-----|-------|------|
| median systolic (outpatient)                                             | 1.0  | 1.1  | 115.2   | 1.0 | 121.8  | 1.0 | 1.1   | 1.1  |
| median diastolic (outpatient)                                            | 1.1  | 1.0  | 71.5    | 1.0 | 67.6   | 1.0 | 1.1   | 1.0  |
| outpatient hypertensive BP count normalized                              | 4.0  | 3.0  | 12.3    | 1.0 | 34.0   | 1.0 | 1.4   | 3.0  |
| outpatient vitals density                                                | 1.4  | 1.2  | 55.2    | 1.0 | 255.9  | 1.0 | 6.5   | 4.3  |
| inpatient visits with vitals count (days)                                | 1.0  | 1.4  | 20.5    | 1.0 | 1.1    | 1.0 | 18.5  | 14.0 |
| inpatient hypertensive BP count (days)                                   | N/A  | 12.0 | 1.3     | N/A | N/A    | 1.0 | 8.0   | N/A  |
| median systolic (inpatient)                                              | 1.3  | 1.1  | 106.4   | 1.0 | 107.7  | 1.0 | 1.3   | 1.1  |
| median diastolic (inpatient)                                             | 1.5  | 1.0  | 66.4    | 1.0 | 58.4   | 1.0 | 1.3   | 1.0  |
| inpatient hypertensive BP count normalized                               | N/A  | 8.8  | 16.2    | N/A | N/A    | 1.0 | 2.3   | N/A  |
| inpatient vitals density                                                 | 1.4  | 1.0  | 314.1   | 1.0 | 4141.0 | 1.0 | 9.3   | 16.0 |
| median pulse (all)                                                       | 1.0  | 1.1  | 69.1    | 1.0 | 72.1   | 1.0 | 1.1   | 1.1  |
| median pulse (outpatient)                                                | 1.0  | 1.1  | 67.7    | 1.0 | 72.7   | 1.0 | 1.1   | 1.1  |
| median pulse (inpatient)                                                 | 1.0  | 1.0  | 67.8    | N/A | 73.7   | 1.0 | 1.1   | N/A  |
| PL count                                                                 | 1.8  | 2.0  | 139.5   | 1.0 | 15.7   | 1.0 | 15.5  | 2.8  |
| DS count                                                                 | N/A  | 2.0  | 3.7     | N/A | N/A    | 1.0 | N/A   | N/A  |
| HPC count                                                                | 4.7  | 1.8  | 42.3    | 1.0 | 9.4    | 1.0 | 21.0  | 1.9  |
| PL hypertension RegEx document matches                                   | N/A  | N/A  | 5.4     | N/A | N/A    | 1.0 | 25.1  | N/A  |
| DS hypertension RegEx document matches                                   | N/A  | N/A  | N/A     | N/A | N/A    | N/A | N/A   | N/A  |
| HPC hypertension RegEx document matches                                  | N/A  | N/A  | 8.9     | 1.0 | N/A    | 1.0 | 18.0  | N/A  |
| PL hypertension regular expression document matches document normalized  | N/A  | N/A  | 10.9    | N/A | N/A    | 1.0 | 1.6   | N/A  |
| DS hypertension regular expression document matches document normalized  | N/A  | N/A  | N/A     | N/A | N/A    | N/A | N/A   | N/A  |
| HPC hypertension regular expression document matches document normalized | N/A  | N/A  | 3.5     | 1.0 | N/A    | 1.0 | 1.2   | N/A  |
| All document count                                                       | 2.3  | 1.9  | 183.7   | 1.0 | 25.1   | 1.0 | 17.1  | 2.6  |
| All doc hypertension regular expression doc matches document normalized  | N/A  | N/A  | 4.1     | 1.0 | N/A    | 1.0 | 1.4   | N/A  |
| All doc hypertension regular expression document matches                 | N/A  | N/A  | 23.0    | 1.0 | N/A    | 1.0 | 23.6  | N/A  |
| PL concept count                                                         | 4.8  | 1.4  | 26185.6 | 1.0 | 274.4  | 1.0 | 456.1 | 9.6  |
| PL hypertension concept count                                            | N/A  | N/A  | 97.7    | 1.0 | N/A    | N/A | 105.6 | N/A  |
| DS concept count                                                         | N/A  | N/A  | 16.3    | N/A | N/A    | N/A | N/A   | N/A  |
| DS hypertension concept count                                            | N/A  | N/A  | N/A     | N/A | N/A    | N/A | N/A   | N/A  |
| HP concept count                                                         | 5.1  | 1.4  | 580.7   | 1.0 | 112.1  | 1.0 | 26.4  | 3.5  |
| HP hypertension concept count                                            | 1.0  | N/A  | 1.3     | 1.0 | 14.4   | 1.0 | 19.0  | N/A  |
| All document concept count                                               | 4.8  | 1.4  | 26937.0 | 1.0 | 331.7  | 1.0 | 392.0 | 9.2  |
| All document hypertension concept count                                  | 24.0 | N/A  | 99.0    | 1.0 | 24.7   | 1.0 | 102.0 | N/A  |
| PL hypertension concept count document normalized                        | N/A  | N/A  | 1.7     | 1.0 | N/A    | N/A | 6.8   | N/A  |
| DS hypertension concept count document normalized                        | N/A  | N/A  | N/A     | N/A | N/A    | N/A | N/A   | N/A  |
| HPC hypertension concept count document normalized                       | 4.7  | N/A  | 10.3    | 1.0 | 43.3   | 1.0 | 1.1   | N/A  |
| All doc hypertension concept count document normalized                   | 56.0 | N/A  | 1.3     | 1.0 | 254.5  | 1.0 | 6.0   | N/A  |
| PL hypertension concept count concept normalized                         | N/A  | N/A  | 84.2    | 1.0 | N/A    | N/A | 4.3   | N/A  |

|                                                       |       |     |       |     |        |     |     |     |     |
|-------------------------------------------------------|-------|-----|-------|-----|--------|-----|-----|-----|-----|
| DS hypertension concept count concept normalized      | N/A   | N/A | N/A   | N/A | N/A    | N/A | N/A | N/A | N/A |
| HPC hypertension concept count concept normalized     | 5.1   | N/A | 100.2 | 1.0 | 367.4  | 1.0 | 1.4 | N/A | N/A |
| All doc hypertension concept count concept normalized | 115.9 | N/A | 82.1  | 1.0 | 2474.0 | 1.0 | 3.8 | N/A | N/A |
